# Supplementary material for: Upregulation of human autophagy-initiation kinase ULK1 by tumor suppressor p53 contributes to DNA-damage-induced cell death
Source: PubMed Central journal article supplement — Cell Death Differ. 2011 Apr 8;18(10):1598–607. doi: 10.1038/cdd.2011.33 (PMC3172118; doi:10.1038/cdd.2011.33), 2011-04-08

# Supplementary Figure 1

| Drug          | CPT |     |   |   |    |    | Eto |    |    |     |
|---------------|-----|-----|---|---|----|----|-----|----|----|-----|
| $\mu\text{M}$ | 0   | 0.5 | 1 | 3 | 10 | 30 | 5   | 15 | 50 | 100 |
| Lanes         | 1   | 2   | 3 | 4 | 5  | 6  | 7   | 8  | 9  | 10  |

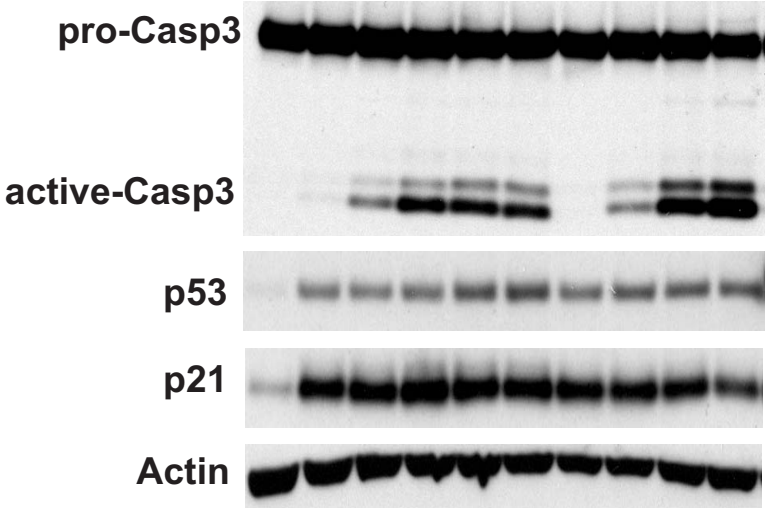

## Supplementary Figure 2

### A

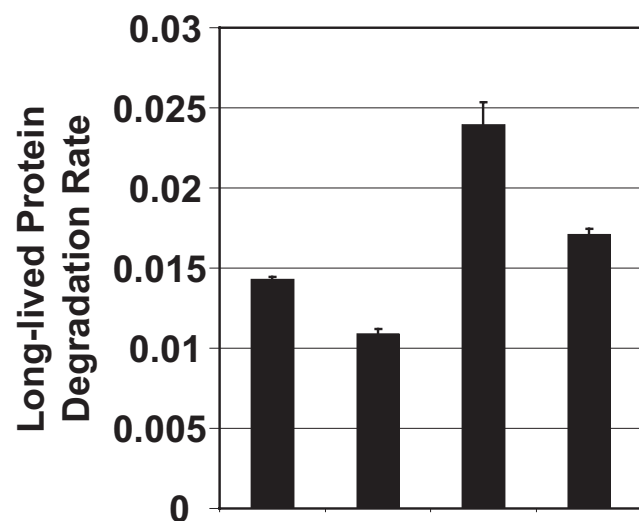

| Lanes | 1 | 2 | 3 | 4 |
|-------|---|---|---|---|
| Tet   | - | + | - | + |
| Eto   | - |   | + |   |

U2OS-Tet-ATG13shRNA

### B

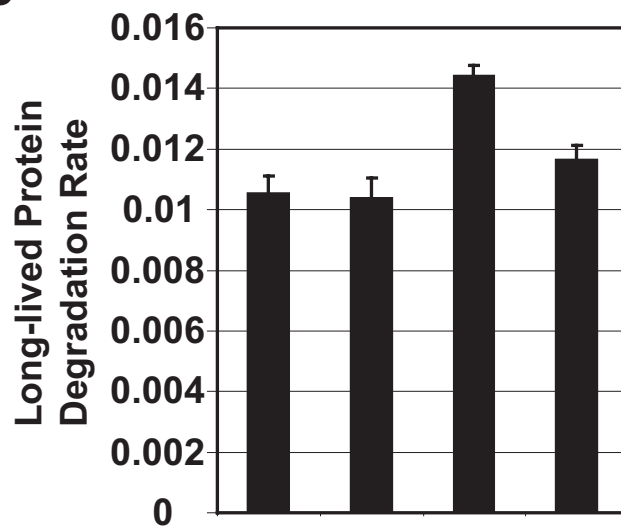

| Lanes | 1 | 2 | 3 | 4 |
|-------|---|---|---|---|
| Tet   | - | + | - | + |
| Eto   | - |   | + |   |

U2OS-Tet-p53shRNA

### Supplementary Figure 3

| Cell  |   | Tet-ATG13shRNA1 |   |   |   |   |   | Tet-ATG13shRNA2 |   |    |  |
|-------|---|-----------------|---|---|---|---|---|-----------------|---|----|--|
| Tet   |   | +               |   |   |   |   |   | -               |   | +  |  |
| Days  | 5 | 1               | 2 | 3 | 4 | 5 | 5 | 5               | 5 | 5  |  |
| Lanes | 1 | 2               | 3 | 4 | 5 | 6 | 7 | 8               | 9 | 10 |  |

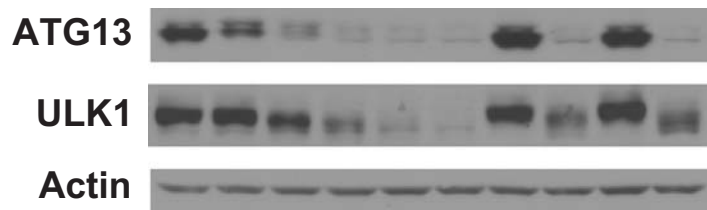

## Supplementary Figure 4

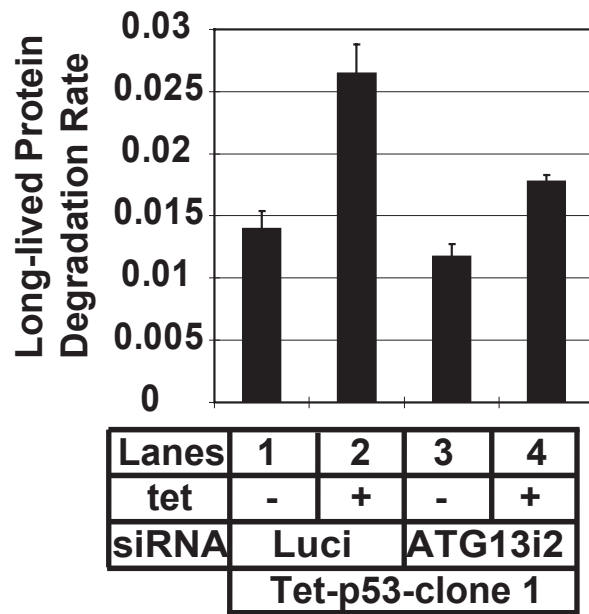

# Supplementary Figure 5

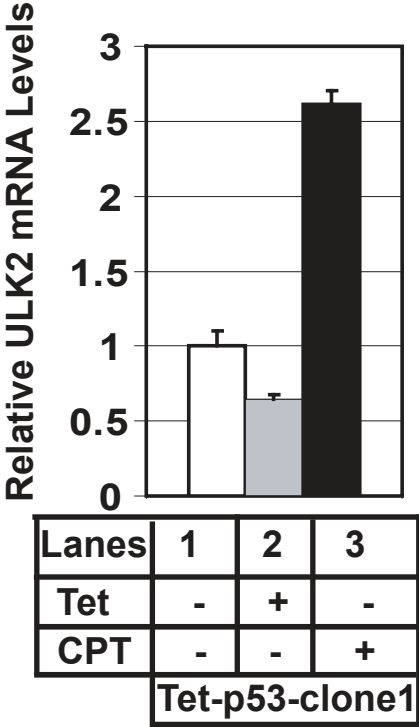

# Supplementary Figure 6

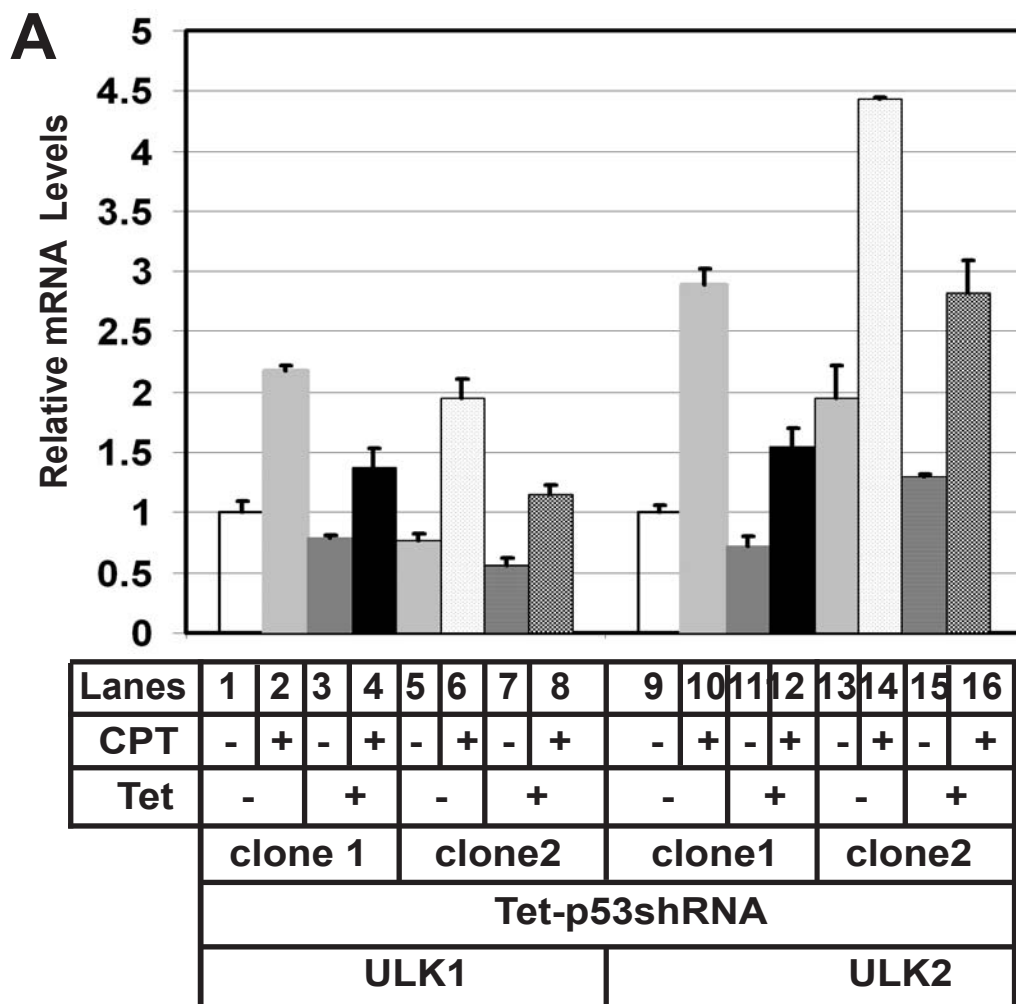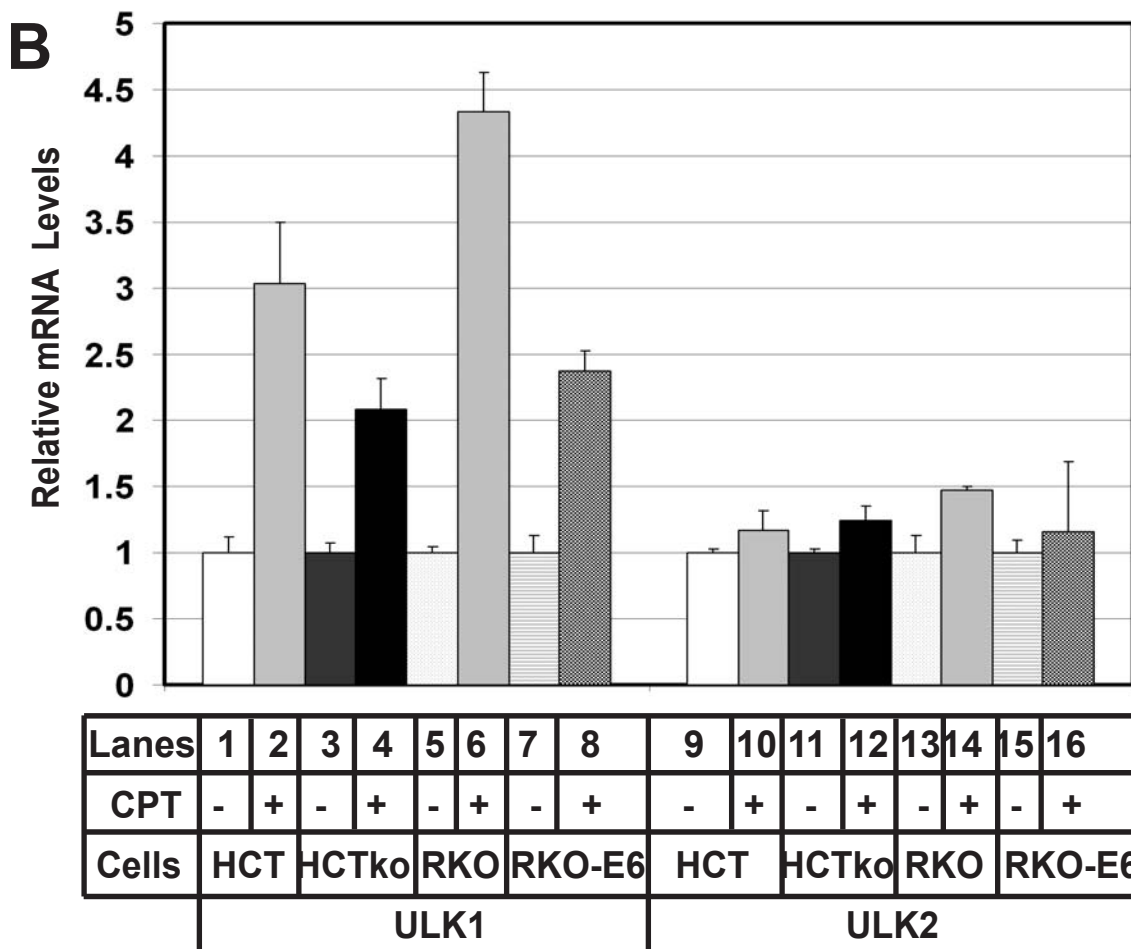

# Supplementary Figure 7

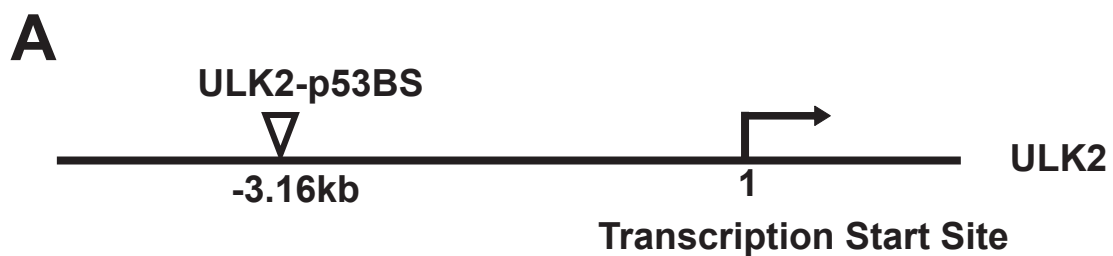

**B**

|              |    |    |    |    |   |
|--------------|----|----|----|----|---|
| rp53         | -  | +  |    |    |   |
| competition  | -  |    | wt | mt |   |
| biotin-p53BS | wt | mt | wt |    |   |
| Lanes        | 1  | 2  | 3  | 4  | 5 |

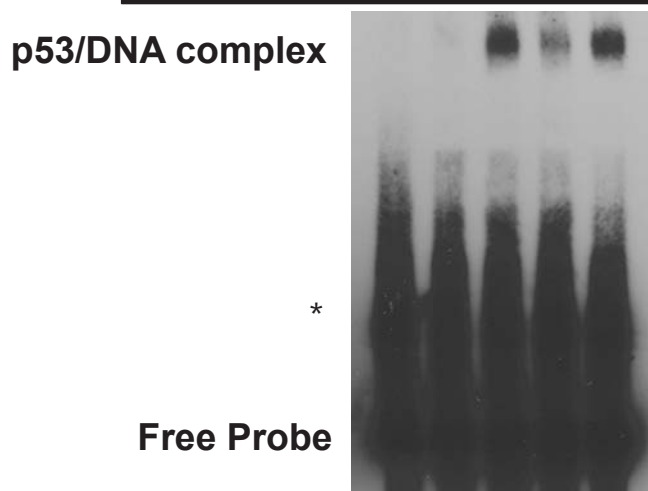

# Supplementary Figure 8

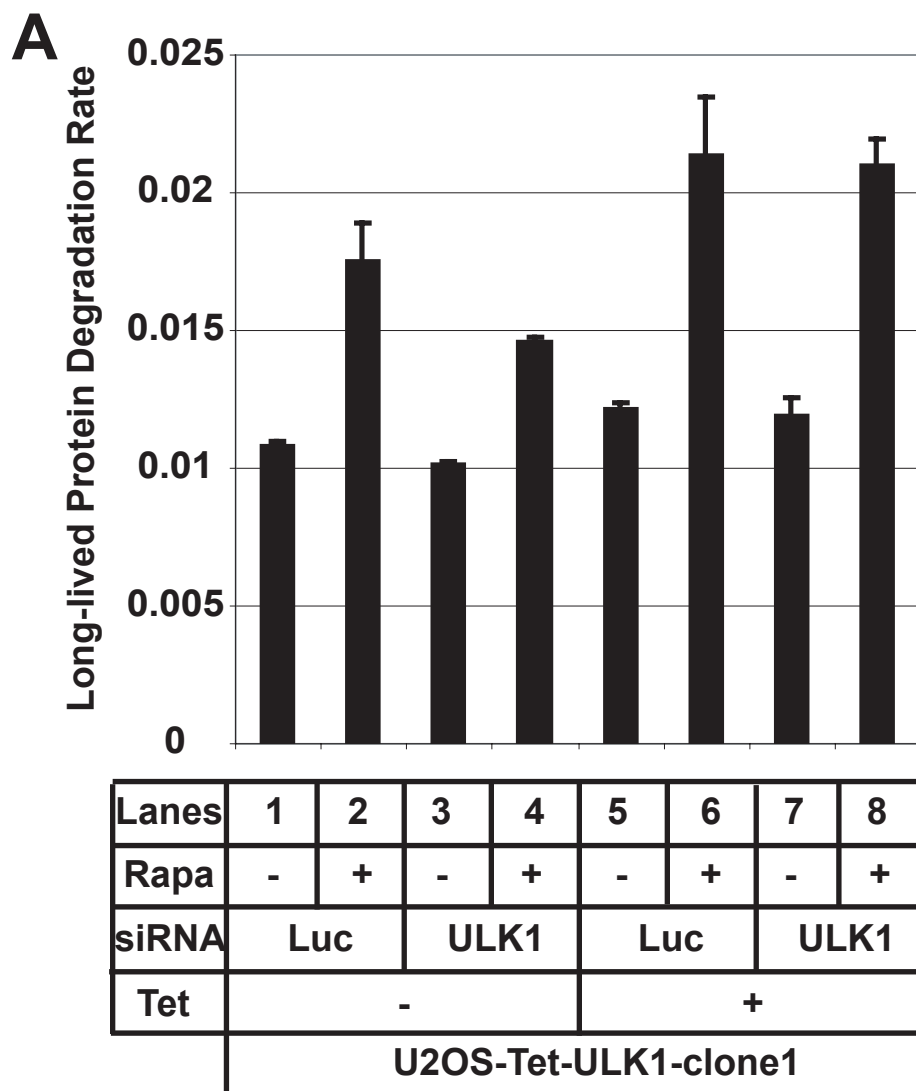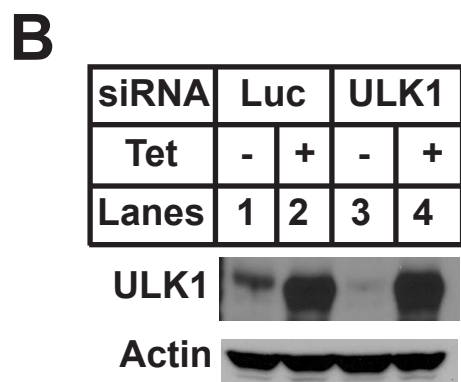



# Supplementary Figure 9

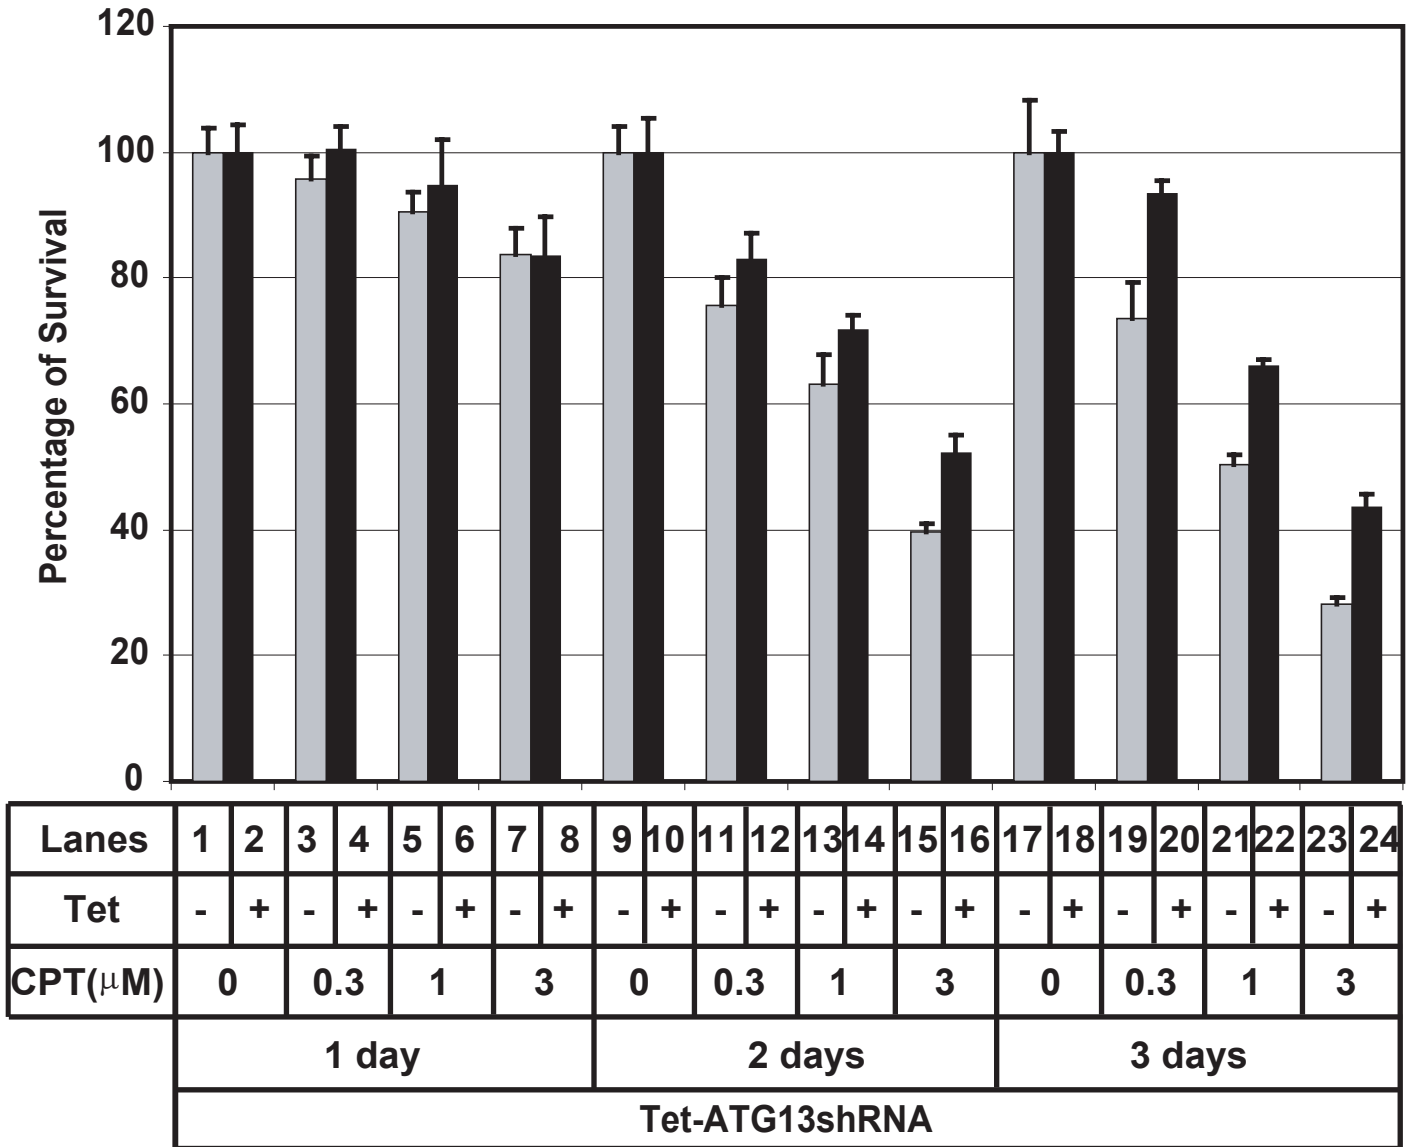

Supplement: cdd201133x1.pdf [file cdd201133x1.pdf]
